# Supplementary material
Source: Springer Nature journal article supplement (https://www.springermedizin.de/resource/supplementary/13019_2010_428_MOESM1_ESM.pdf/9638664)
Supplement: MOESM1 [file 9638664]

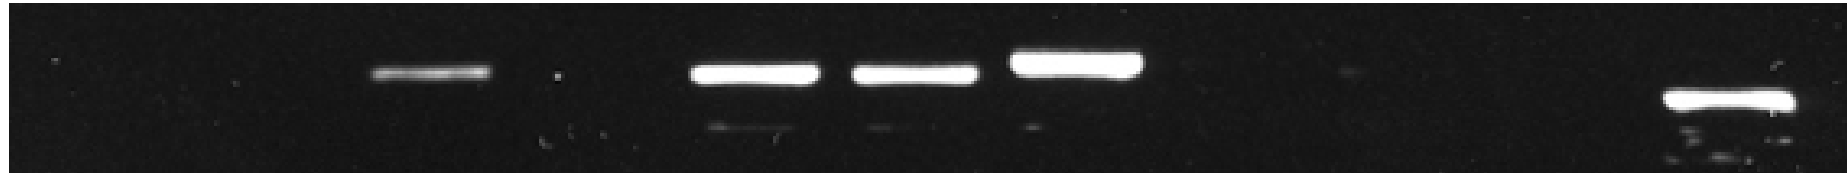

DGK $\alpha$

DGK $\beta$

DGK $\gamma$

DGK $\delta$

DGK $\epsilon$

DGK $\eta$

DGK $\zeta$

DGK $\iota$

DGK $\theta$

DGK $\kappa$

GAPDH
